# Supplementary material for: Genomic Amplification and Functional Dependency of the Gamma Actin Gene ACTG1 in Uterine Cancer
Source: MDPI journal article supplement (doi:10.3390/ijms21228690), 2020-11-18
Supplement: s1 [file s1]

## Pan Cancer

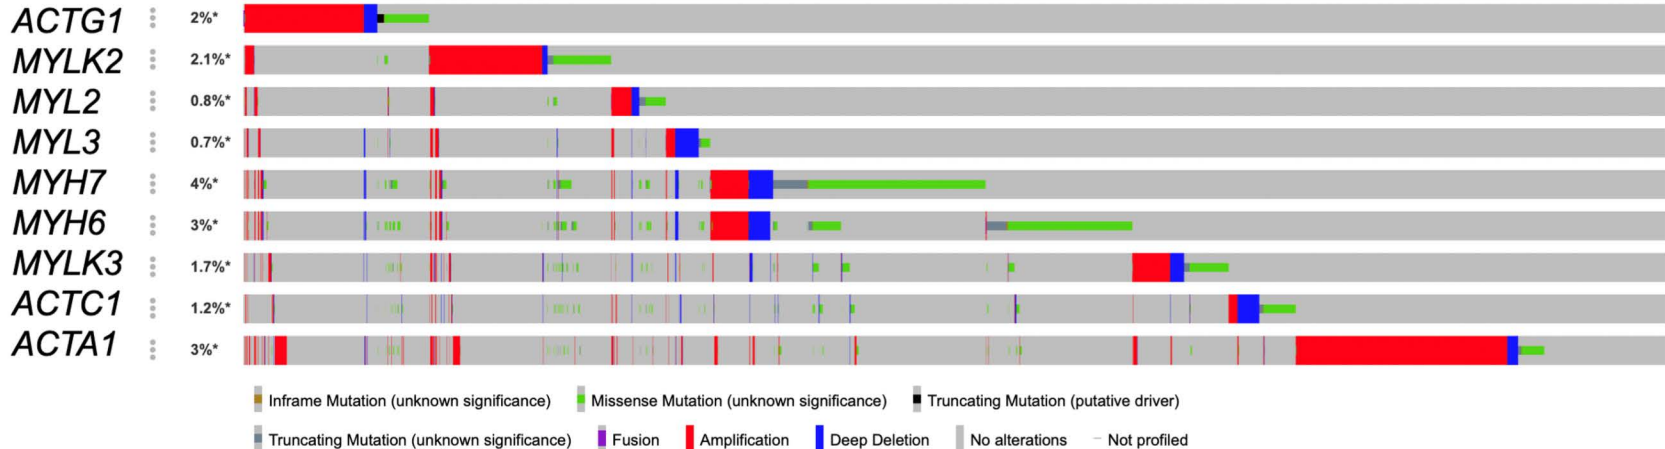

**Supplemental Figure 1.** Trends of genomic alterations are confirmed in a greater cohort of 176 Pan Cancer studies (n=46697).

## Supplemental Figure 1

## TCGA

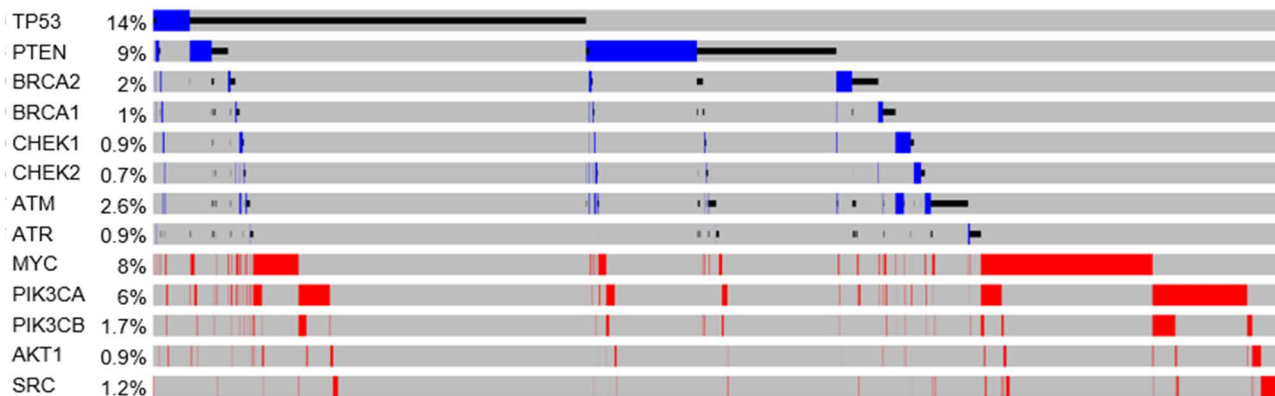

## Pan Cancer

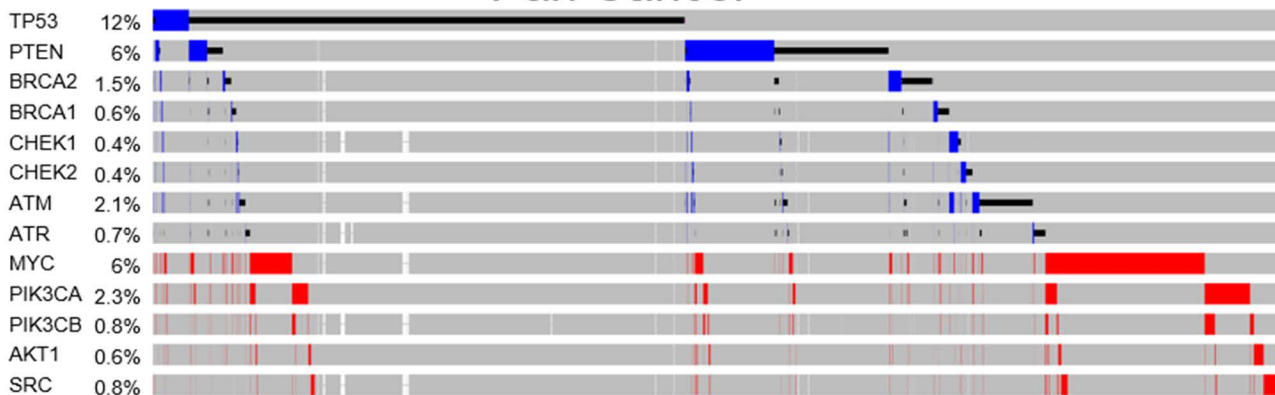

**Supplemental Figure 2.** Genomic dysregulation of tumor suppressor or oncogenes in cancers. Deletions (blue) and truncation mutations (black) for tumor suppressor genes and amplifications (red) and oncogenes are shown in (A) 32 TCGA Pan Cancer studies (n=10967) as well as (B) 176 Pan Cancer studies (n=46697).

## Supplemental Figure 2

**A**

### MYH6 and MYH7 gene dysregulation

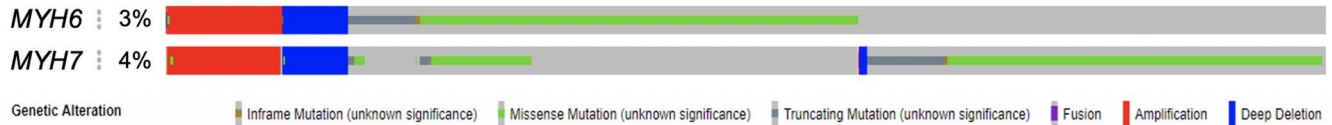**B**

### MYH6 and MYH7 mutations

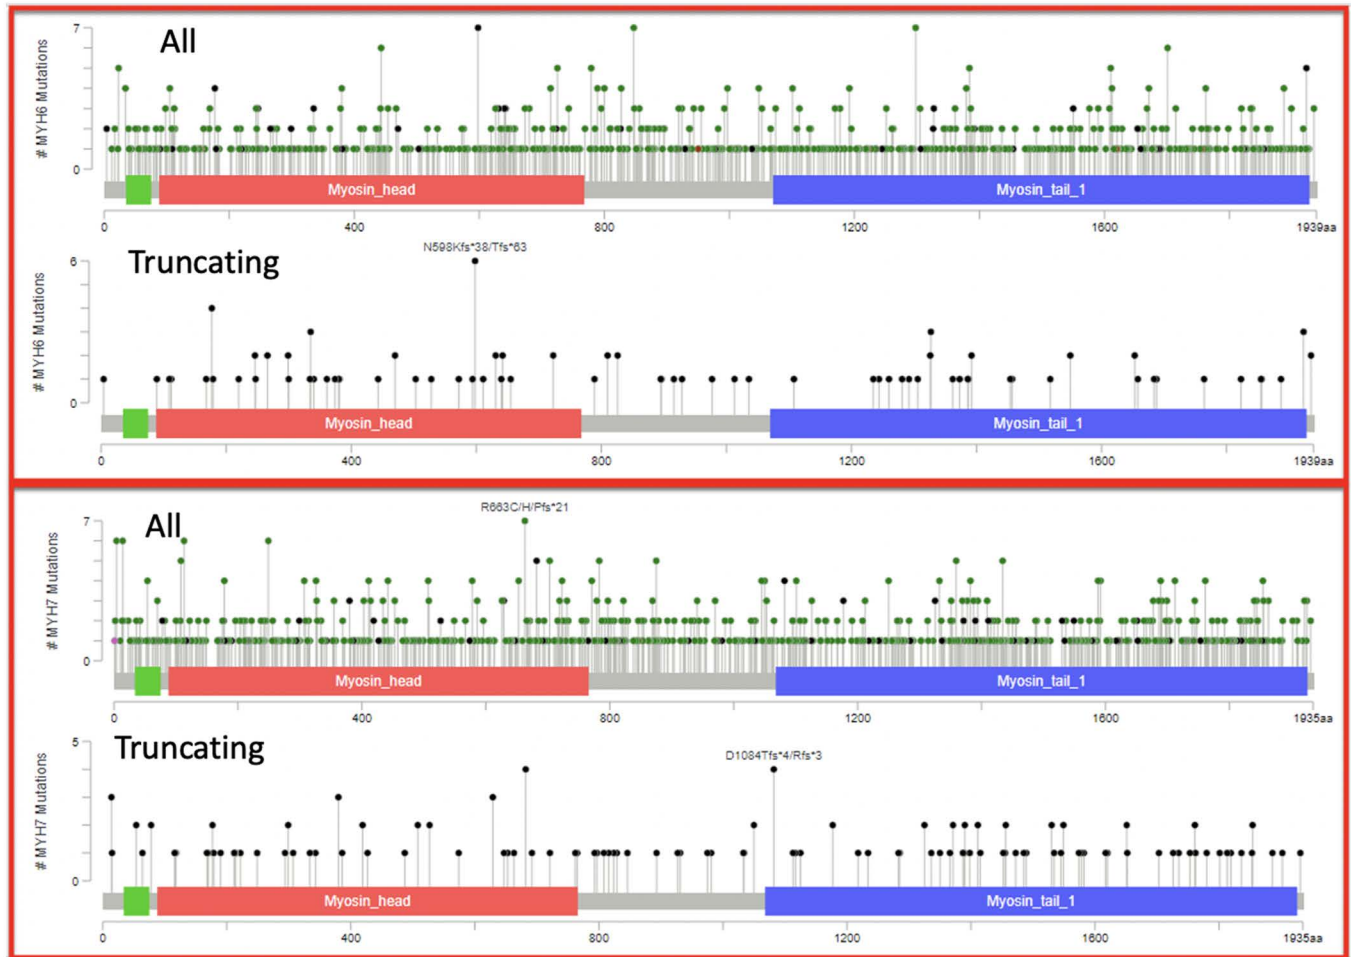

**Supplemental Figure 3.** Genomic dysregulation of cardiac myosin heavy chain MYH6 and MYH7 genes in cancer. **(A)** MYH6 and MYH7 genes are co-amplified or deleted in the same tumor samples (n=46697); **(B)** MYH6 and MYH7 genes are recurrently mutated in cancer (n=46697). To visualize mutations in these genes, we examined changes throughout the gene with the x-axis representing the amino acid number and the y-axis represents the total mutation counts at a specific residue. 960 mutations were observed in MYH6 while 1081 mutations for observed in MYH7. Missense (green) and truncation (black) mutations are shown. Truncation mutations are frequent and distributed throughout the two genes.

## Supplemental Figure 3

## *ACTA1* and *MDM4* dysregulation

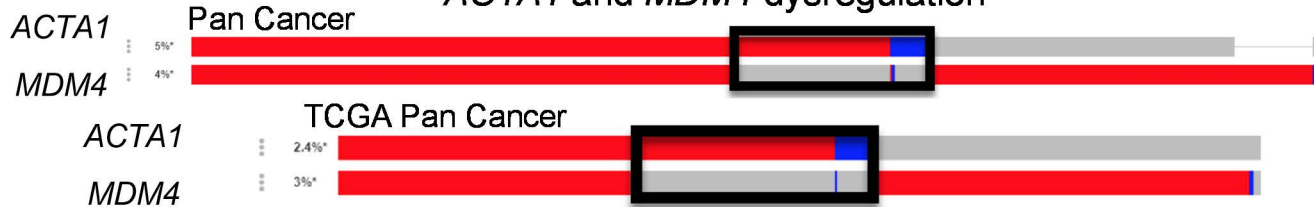

**Supplemental Figure 4.** Copy number variations of *ACTA1* are observed in cancers (176 Pan Cancer studies). *ACTA1*, located next to *MDM4* at 1q42.13, is amplified independent of *MDM4* in limited patient tumor samples (black box).

# Supplemental Figure 4

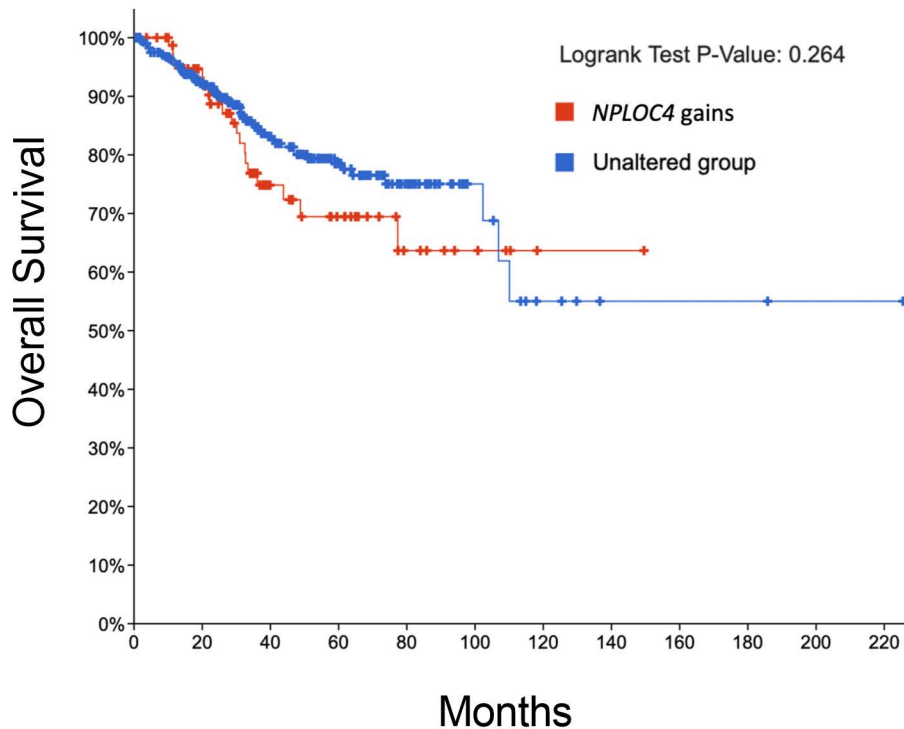

**Supplemental Figure 5.** Kaplan-Meier curve for *NPLOC4* in UCEC. The altered group represents overall gain, including amplification and overexpression.

## Supplementary Figure 5

**Supplementary Table 1.** Genomic location of nine myosin and actin genes of interest.

| Gene             | MYL2                 | MYL3                 | MYH7                 | MYH6                 | MYLK2                       | MYLK3                       | ACTC1                        | ACTA1                          | ACTG1                     |
|------------------|----------------------|----------------------|----------------------|----------------------|-----------------------------|-----------------------------|------------------------------|--------------------------------|---------------------------|
| Name             | Myosin Light Chain 2 | Myosin Light Chain 3 | Myosin Heavy Chain 7 | Myosin Heavy Chain 6 | Myosin Light Chain Kinase 2 | Myosin Light Chain Kinase 3 | Actin Alpha 1 Cardiac Muscle | Actin Alpha 1, Skeletal Muscle | Actin Gamma 1 Cytoplasmic |
| Genomic Location | 12q24.11             | 3p21.31              | 14q11.2              | 14q11.2              | 20q11.21                    | 16q11.2                     | 15q14                        | 1q42.13                        | 17q25.3                   |

**Supplementary Table 2.** Hallmark gene set ranking based on GSEA analysis of *ACTG1* gains in UCEC. Pathways are ranked by NES (Net Enrichment Score).

| UCEC                              |         |        |
|-----------------------------------|---------|--------|
| Hallmark Gene Set                 | NES     | FDR    |
| Interferon Gamma Response         | -2.033  | 0      |
| KRAS Signaling (Down)             | 2.14    | 0      |
| Apical Junction                   | 2.214   | 0      |
| Myogenesis                        | 2.2559  | 0      |
| Allograft Rejection               | -1.9148 | 0.0009 |
| MYC Targets (V2)                  | 1.8584  | 0.0009 |
| Interferon Alpha Response         | -1.8716 | 0.001  |
| Epithelial Mesenchymal Transition | 1.8687  | 0.0011 |
| Protein Secretion                 | -1.829  | 0.0015 |
| Cholesterol Homeostasis           | 1.8063  | 0.0018 |
| Androgen Response                 | -1.6895 | 0.0065 |
| Apical Surface                    | 1.6405  | 0.0075 |
| UV Response (UP)                  | 1.561   | 0.0142 |
| Hypoxia                           | 1.5618  | 0.016  |
| Estrogen Response (Late)          | 1.5198  | 0.019  |
| IL6 JAK STAT3 Signaling           | -1.4886 | 0.0402 |
| KRAS Signaling (Up)               | -1.429  | 0.0611 |
| Coagulation                       | 1.3776  | 0.0614 |
| Glycolysis                        | 1.3462  | 0.0743 |
| Fatty Acid Metabolism             | -1.3571 | 0.0765 |
| Pancreas Beta Cells               | -1.3633 | 0.0795 |
| Complement                        | -1.3689 | 0.0841 |
| Inflammatory Response             | -1.3804 | 0.0851 |

**Supplementary Table 3.** Hallmark gene set ranking based on GSEA analysis of *ACTG1* gains in UCS. Pathways are ranked by NES (Net Enrichment Score).

| UCS                               |         |        |
|-----------------------------------|---------|--------|
| Hallmark Gene Set                 | NES     | FDR    |
| Interferon Gamma Response         | -2.5541 | 0      |
| Allograft Rejection               | -2.3693 | 0      |
| Interferon Alpha Response         | -2.3287 | 0      |
| Myogenesis                        | -2.268  | 0      |
| IL6 JAK STAT3 Signaling           | -2.2616 | 0      |
| Inflammatory Response             | -2.1501 | 0      |
| Complement                        | -1.9128 | 0.0001 |
| IL2 Stat5 Signaling               | -1.7256 | 0.003  |
| Xenobiotic Metabolism             | -1.597  | 0.0102 |
| Apical Surface                    | -1.5643 | 0.0144 |
| Epithelial Mesenchymal Transition | -1.4791 | 0.0348 |
| KRAS Signaling (Up)               | -1.4572 | 0.0364 |
| Adipogenesis                      | -1.4587 | 0.0385 |
| Apoptosis                         | -1.444  | 0.0388 |
| TNFA Signaling (Via NFkB)         | -1.4121 | 0.0489 |
| Estrogen Response Early           | -1.3866 | 0.0606 |
| Pancreas Beta Cells               | -1.3791 | 0.0612 |



**Supplementary Table 4.** Oncogenic signaling program rankings based on GSEA analysis of *ACTG1* gains in UCEC and UCS.

| Oncogenic Signaling Programs. C6   | UCS-NES | UCS-FDR | UCEC-NES | UCEC-FDR |
|------------------------------------|---------|---------|----------|----------|
| RPS14_DN.V1_UP                     | -1.993  | 0.000   | -1.851   | 0.000    |
| LTE2_UP.V1_DN                      | -1.754  | 0.006   | -1.884   | 0.000    |
| BMI1_DN.V1_UP                      | -1.713  | 0.009   | 1.923    | 0.001    |
| HOXA9_DN.V1_UP                     | -1.661  | 0.011   | -2.127   | 0.000    |
| MEK_UP.V1_DN                       | -1.615  | 0.015   | -2.278   | 0.000    |
| STK33_SKM_UP                       | -1.579  | 0.015   | -2.329   | 0.000    |
| LEF1_UP.V1_UP                      | -1.588  | 0.014   | 1.893    | 0.001    |
| LEF1_UP.V1_DN                      | -1.592  | 0.017   | -1.862   | 0.000    |
| MEL18_DN.V1_UP                     | -1.646  | 0.013   | 1.447    | 0.030    |
| KRAS_50_UP.V1_DN                   | 1.558   | 0.049   | 2.103    | 0.000    |
| ATF2_UP.V1_UP                      | -1.452  | 0.049   | 1.926    | 0.001    |
| AKT_UP.V1_DN                       | -1.569  | 0.015   | 1.401    | 0.041    |
| EIF4E_DN                           | -1.427  | 0.062   | -1.762   | 0.001    |
| GCNP_SHH_UP_LATE.V1_DN             | -1.390  | 0.077   | 2.021    | 0.000    |
| KRAS.BREAST_UP.V1_DN               | -1.419  | 0.062   | 1.547    | 0.018    |
| KRAS.LUNG.BREAST_UP.V1_DN          | 1.357   | 0.083   | 1.800    | 0.003    |
| JAK2_DN.V1_DN                      | 1.364   | 0.089   | -1.879   | 0.000    |
| PRC1_BMI_UP.V1_DN                  | 1.560   | 0.097   | 1.857    | 0.001    |
| BCAT_GDS748_UP                     | -1.590  | 0.015   | -1.393   | 0.088    |
| KRAS.BREAST_UP.V1_UP               | -1.372  | 0.082   | 1.512    | 0.022    |
| ESC_J1_UP_LATE.V1_UP               | -1.680  | 0.013   | 1.282    | 0.099    |
| KRAS.PROSTATE_UP.V1_DN             | 1.369   | 0.100   | 1.412    | 0.040    |
| CORDENONSI_YAP_CONSERVED_SIGNATURE | -1.401  | 0.074   | 1.295    | 0.093    |

**Supplementary Table 5.** Categorization of *ACTG1* dependent and non-dependent cell lines in uterine cancer.

| Dependent Cell Lines     |                             |                    |
|--------------------------|-----------------------------|--------------------|
| Cell Line                | Lineage Subtype             | Primary/Metastasis |
| KLE                      | Endometrial Adenocarcinoma  | Primary            |
| HEC6                     | Endometrial Adenocarcinoma  | Primary            |
| EN                       | Endometrial Adenocarcinoma  | Primary            |
| ESS1                     | Endometrial Stromal Sarcoma | Primary            |
| SNGM                     | Endometrial Adenocarcinoma  | Metastasis         |
| HEC50B                   | Endometrial Adenocarcinoma  | Metastasis         |
| HEC251                   | Endometrial Adenocarcinoma  | Primary            |
| JAR                      | Choriocarcinoma             | Primary            |
| MFE319                   | Endometrial Adenocarcinoma  | N/A                |
| SNU685                   | Carcinosarcoma              | Primary            |
| JHUEM7                   | Endometrial Adenocarcinoma  | Primary            |
| Non-Dependent Cell Lines |                             |                    |
| Cell Line                | Lineage Subtype             | Primary/Metastasis |
| TEN                      | Clear Cell Carcinoma        | Primary            |
| HEC59                    | Endometrial Adenocarcinoma  | Primary            |
| HEC1B                    | Endometrial Adenocarcinoma  | Primary            |
| JHUEM1                   | Endometrial Adenocarcinoma  | Primary            |
| SNU1077                  | Carcinosarcoma              | Primary            |
| RL952                    | Endometrial Adenosquamous   | Primary            |
| HEC265                   | Endometrial Adenocarcinoma  | Primary            |
| SKGI                     | Endometrial Squamous        | Primary            |
